# Supplementary material for: Molecular de-novo design through deep reinforcement learning
Source: PubMed Central journal article supplement (PMC5583141; doi:10.1186/s13321-017-0235-x), 2017-09-04
Supplement: 13321_2017_235_MOESM1_ESM.pdf [file 13321_2017_235_MOESM1_ESM.pdf]

# 1 Additional File 1.

Here is shown how the cost function of the form  $J(\theta) = [\log P(A)_{\mathbb{A}} - \log P(A)_{\mathbb{U}}]^2$  can be expressed as a REINFORCE algorithm with a single point estimate of the return  $G(a_t, s_t) = [\log P(A)_{\mathbb{A}} - \log P(A)_{\mathbb{U}}]^2 / \log P(A)_{\mathbb{A}}$ . A REINFORCE type algorithm for an episode  $\{s_0, a_0, r_0, \dots, s_T, a_T, r_T\}$  following the stochastic policy  $\pi_\theta$  is described by the update rule:

$$\theta = \theta - \alpha \nabla_\theta \sum_{t=0}^T \log \pi_\theta(a_t | s_t) (G(a_t, s_t) - b)$$

Where  $\alpha$  in this case is the step size,  $b$  is the reward baseline, and  $G(a_t, s_t) = \sum_{t=0}^T (r_t)$  is the observed cumulative reward from time  $t$  until the end of the episode. In a REINFORCE algorithm this single sampled trajectory serves as an unbiased estimator of the expected cumulative reward. If we use a zero baseline  $b = 0$ , this is equivalent to the cost function:

$$J(\theta) = \sum_{t=0}^T \log \pi_\theta(a_t | s_t) G(a_t, s_t)$$

If we define the reward for any state-action pair during the episode as equal to 0 except for the last step where it is  $G(A)$ , this expression can be written as:

$$\forall t \in [0, \dots, T], G(a_t, s_t) = \sum_t (r_t) = G(A)$$

The cost function becomes:

$$J(\theta) = \sum_{t=0}^T \log \pi_\theta(a_t | s_t) G(a_t, s_t) = G(A) \sum_{t=0}^T \log \pi_\theta(a_t | s_t)$$

We now note that the sum  $\sum_{t=0}^T \log \pi_\theta(a_t | s_t)$  is equal to the Agent likelihood for the sequence:

$$J(\theta) = G(A) \sum_{t=0}^T \log \pi_\theta(a_t | s_t) = G(A) \log P(A)_{\mathbb{A}}$$

If we choose the reward for the final step of the sequence  $A$  to be  $G(A) = [\log P(A)_{\mathbb{A}} - \log P(A)_{\mathbb{U}}]^2 / \log P(A)_{\mathbb{A}}$ , we recover our initial cost function:

$$J(\theta) = \frac{[\log P(A)_{\mathbb{A}} - \log P(A)_{\mathbb{U}}]^2}{\log P(A)_{\mathbb{A}}} \log P(A)_{\mathbb{A}} = [\log P(A)_{\mathbb{A}} - \log P(A)_{\mathbb{U}}]^2$$

■
