# Supplementary material for: Molecular de-novo design through deep reinforcement learning
Source: PubMed Central journal article supplement (PMC5583141; doi:10.1186/s13321-017-0235-x), 2017-09-04
Supplement: 13321_2017_235_MOESM2_ESM.pdf [file 13321_2017_235_MOESM2_ESM.pdf]

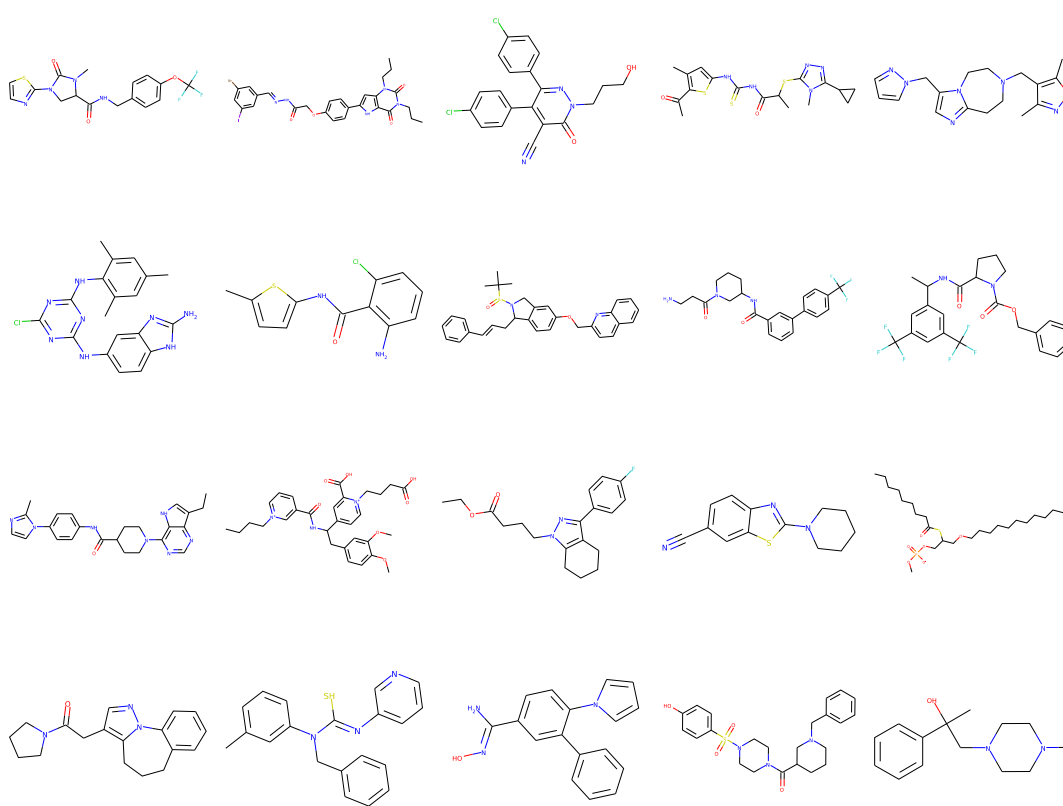

**Figure 10** Additional file 2.1 Randomly selected structures generated by the canonical Prior.

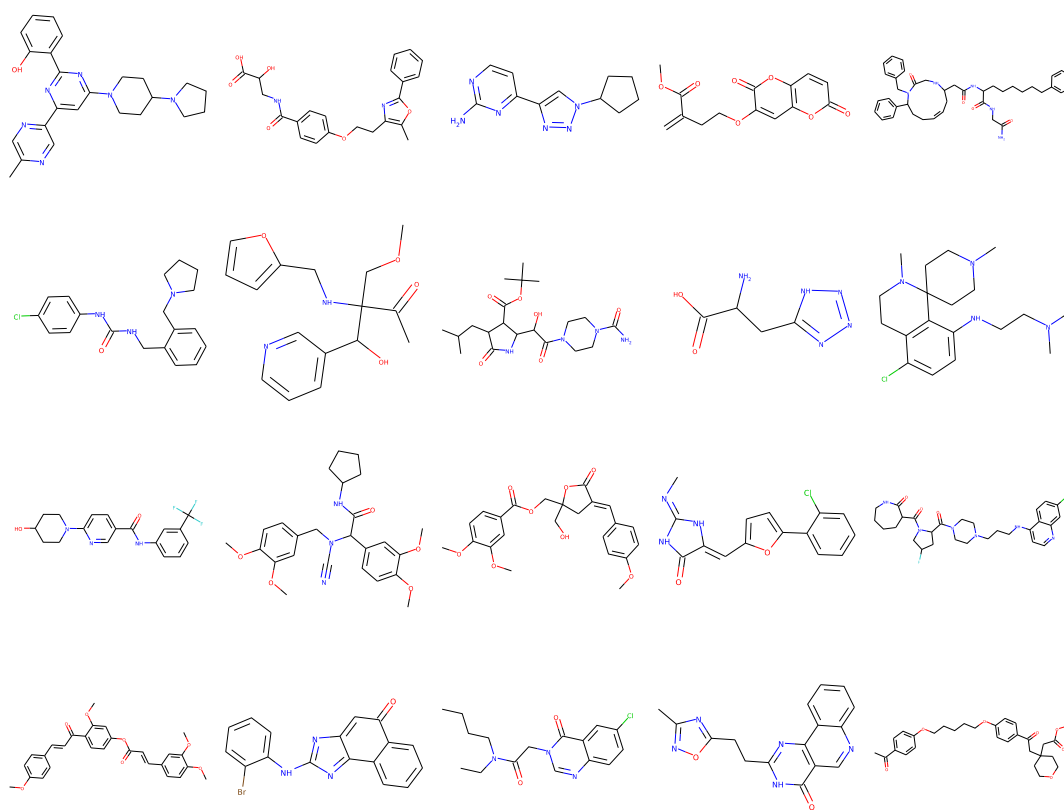

**Figure 11** Additional file 2.2 Randomly selected structures generated by the Agent trained to avoid sulphur.

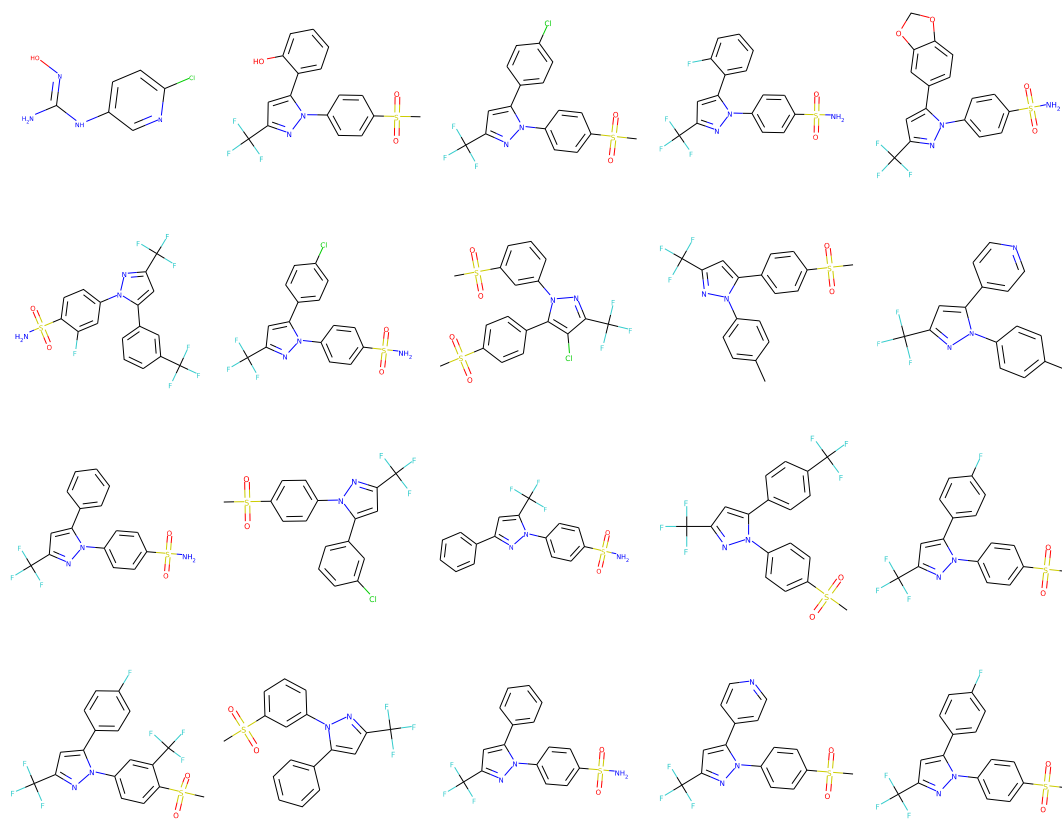

**Figure 12** Additional file 2.3 Randomly selected structures generated by the Agent based on the reduced Prior trained to design analogues of Celecoxib.

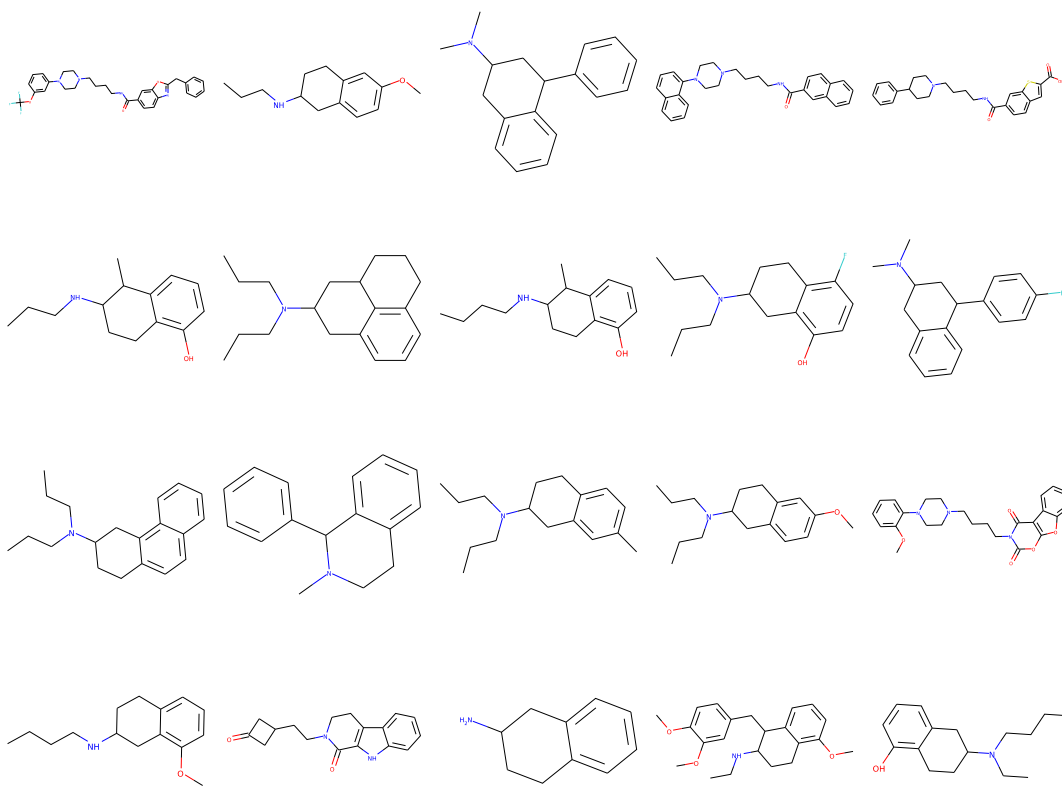

**Figure 13 Additional file 2.4** Randomly selected structures generated by the Agent based on the reduced Prior trained to design actives against DRD2.
